# Supplementary material for: Ageing-associated changes in transcriptional elongation influence longevity
Source: PubMed Central journal article supplement (PMC10132977; doi:10.1038/s41586-023-05922-y), 2023-04-12
Supplement: 41586_2023_5922_MOESM1_ESM.pdf [file 41586_2023_5922_MOESM1_ESM.pdf]

**Supplementary information**

---

**Ageing-associated changes in  
transcriptional elongation influence  
longevity**

---

In the format provided by the  
authors and unedited

Supplementary Figure 1

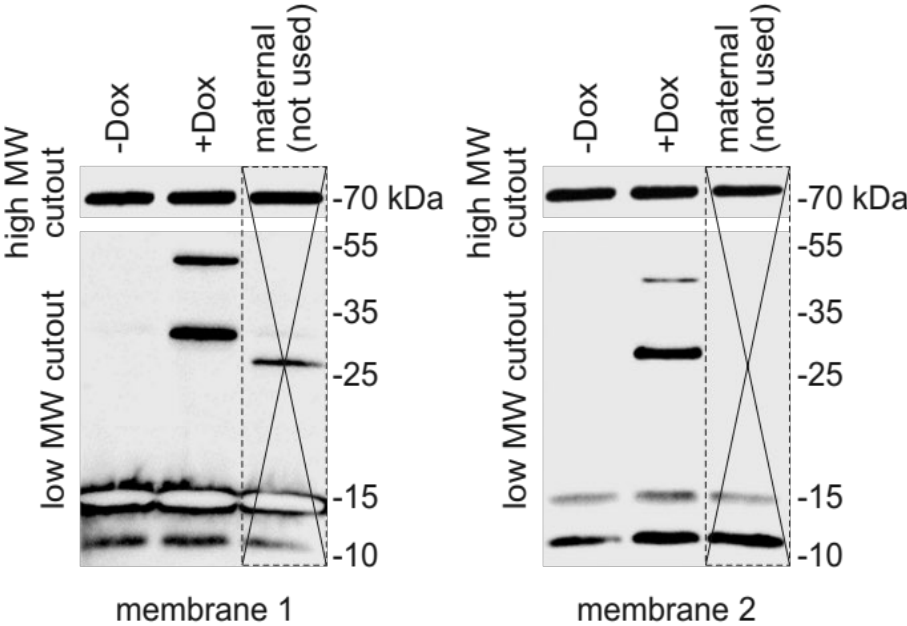

**Supplementary Table 1:** Description of the RNA-seq datasets used in the study.

| <b>Species</b>         | <b>Tissue</b> | <b>Enrichment protocol</b>        | <b>Sequencing parameters</b><br>Paired-/single-end, read length, millions of reads (M) | <b>Time points<sup>1</sup> and conditions</b>                                                          |
|------------------------|---------------|-----------------------------------|----------------------------------------------------------------------------------------|--------------------------------------------------------------------------------------------------------|
| <i>C. elegans</i>      | Whole body    | TruSeq Stranded Total RNA Library | Paired-end, 75 bp, 25 M                                                                | Day 1 ( <i>WT</i> ), day 7 ( <i>WT</i> ), day 14 ( <i>WT</i> ), day 21 ( <i>WT</i> )                   |
|                        | Whole body    | TruSeq Stranded Total RNA Library | Paired-end, 75 bp, 25 M                                                                | Day 14 ( <i>WT</i> , <i>daf-2(e1370)</i> , <i>ama-1(m322)</i> )                                        |
|                        | Whole Body    | TruSeq Stranded Total RNA library | Paired-end, 75 bp, 25 M                                                                | Day 1 ( <i>WT</i> , <i>ama-1(m322)</i> )                                                               |
| <i>D. melanogaster</i> | Head          | TruSeq Stranded Total RNA Library | Single-end, 100 bp, 37.5 M                                                             | Day 30 ( <i>WT</i> , <i>dilp2,3-5</i> ), Day 50 ( <i>WT</i> , <i>dilp2,3-5</i> )                       |
|                        | Head          | TruSeq Stranded Total RNA Library | Paired-end, 75 bp, 30 M                                                                | Day 10 ( <i>WT</i> , <i>RpII215<sup>C4</sup></i> ), day 50 ( <i>WT</i> , <i>RpII215<sup>C4</sup></i> ) |
| <i>M. musculus</i>     | Kidney        | TruSeq Stranded Total RNA Library | Paired-end, 75 bp, 70 M                                                                | Month 3 ( <i>WT</i> ), month 24 ( <i>WT</i> )                                                          |
|                        | Kidney        | TruSeq Stranded Total RNA Library | Paired-end, 75 bp, 30 M                                                                | Month 3 ( <i>WT</i> , <i>DR</i> ) (4 replicates)                                                       |
|                        | Liver         | TruSeq Stranded Total RNA Library | Paired-end, 75 bp, 37.5 M                                                              | Month 5 ( <i>WT</i> , <i>DR</i> )                                                                      |
|                        | Liver         | TruSeq Stranded Total RNA Library | Paired-end, 75 bp, 37.5 M                                                              | Month 16 ( <i>WT</i> , <i>DR</i> )                                                                     |

<sup>1</sup> Triplicate except where mentioned otherwise.

| Species                      | Tissue                                       | Enrichment protocol                        | Sequencing parameters<br>Paired-/single-end,<br>read length, millions<br>of reads (M) | Time points <sup>1</sup> and<br>conditions                         |
|------------------------------|----------------------------------------------|--------------------------------------------|---------------------------------------------------------------------------------------|--------------------------------------------------------------------|
|                              | Liver                                        | TruSeq<br>Stranded<br>Total RNA<br>Library | Paired-end, 75 bp,<br>37.5 M                                                          | Month 27 ( <i>WT</i> , <i>DR</i> )                                 |
|                              | Blood                                        | TruSeq<br>Stranded<br>Total RNA<br>Library | Paired-end, 75 bp,<br>70 M                                                            | Month 5 ( <i>WT</i> ),<br>month 27 ( <i>WT</i> )                   |
|                              | Hypothalamu<br>s                             | TruSeq<br>Stranded<br>Total RNA<br>Library | Single-end, 100 bp,<br>30 M                                                           | Month 26 ( <i>WT</i> ,<br><i>IRS1</i> <sup>-/-</sup> )             |
| <i>R. norvegicus</i><br>(17) | Liver                                        | TruSeq<br>Stranded<br>Total RNA<br>Library | Single-end, 50 bp,<br>60 M                                                            | Month 6 ( <i>WT</i> ),<br>month 24 ( <i>WT</i> ) (2<br>replicates) |
|                              | Brain <sup>2</sup>                           | TruSeq<br>Stranded<br>Total RNA<br>Library | Single-end, 50 bp,<br>20 M                                                            | Month 6 ( <i>WT</i> ),<br>month 24 ( <i>WT</i> ) (6<br>replicates) |
| <i>H. sapiens</i>            | Fetal lungs<br>(IMR90)                       | Nascent<br>RNA                             | Paired-end, 75 bp, 25<br>M                                                            | Early passage, late<br>passage (2<br>replicates)                   |
|                              | Fetal lungs<br>(IMR90)                       | TruSeq<br>Stranded<br>Total RNA<br>Library | Paired-end, 75 bp, 50<br>M                                                            | Early passage, late<br>passage (2<br>replicates)                   |
|                              | Umbilical<br>vein<br>endothelial<br>(HUVECs) | Nascent<br>RNA                             | Paired-end, 75 bp, 50<br>M                                                            | Early passage, late<br>passage (2<br>replicates)                   |
|                              | Umbilical<br>vein<br>endothelial<br>(HUVECs) | TruSeq<br>Stranded<br>Total RNA<br>Library | Paired-end, 75 bp,<br>100 M                                                           | Early passage, late<br>passage                                     |

<sup>2</sup> Not included in the analysis due to low coverage (bellow 1X genome coverage or 29 M sequenced reads for *R. norvegicus* ; genome coverage calculated using Lander-Waterman formula)

| <b>Species</b> | <b>Tissue</b>   | <b>Enrichment protocol</b>        | <b>Sequencing parameters</b><br>Paired-/single-end,<br>read length, millions<br>of reads (M) | <b>Time points<sup>1</sup> and conditions</b>                       |
|----------------|-----------------|-----------------------------------|----------------------------------------------------------------------------------------------|---------------------------------------------------------------------|
|                | Fibroblast skin | TruSeq Stranded Total RNA Library | Paired-end, 100 <i>bp</i> , 100 M                                                            | Progeria patient (HSS) (2 replicates)                               |
|                |                 |                                   | Paired-end, 75 <i>bp</i> , 100 M                                                             | Healthy donor, sex/age matched with progeria patient (2 replicates) |
|                | Blood           | TruSeq Stranded Total RNA Library | Paired-end, 75 <i>bp</i> , 70 M                                                              | Healthy donor, 6 females, 6 males, age range: 21-70                 |

**Supplementary Table 2:** Pearson correlations between the change in elongation rate and characteristics of the introns in which the elongation rate was measured in the respective RNA-Seq datasets

| <b>Species</b>         | <b>Comparison</b>                  | <b>Distance from promoter</b> | <b>Intron length</b> | <b>Gene expression log2FC</b> | <b>Circular RNA index</b> |
|------------------------|------------------------------------|-------------------------------|----------------------|-------------------------------|---------------------------|
| <i>C. elegans</i>      | 21 d vs 1 d                        | 0.014                         | 0.071                | -0.266                        | -0.085                    |
| <i>C. elegans</i>      | 14 d ama-1 vs 14 d wt              | 0.008                         | -0.110               | -0.247                        | 0.160                     |
| <i>C. elegans</i>      | 14 d daf2 vs 14 d wt               | 0.020                         | 0.007                | -0.278                        | 0.130                     |
| <i>D. melanogaster</i> | 50 d vs 10 d                       | -0.036                        | 0.019                | -0.023                        | 0.019                     |
| <i>D. melanogaster</i> | 50 d RpII215 vs 50 d               | 0.002                         | -0.091               | -0.161                        | -0.043                    |
| <i>D. melanogaster</i> | 50 d dilp 2,3-5 vs 50 d            | -0.133                        | -0.170               | 0.041                         | -0.092                    |
| <i>M. musculus</i>     | 24 mo vs 3.5 mo                    | 0.011                         | 0.043                | -0.230                        | -0.045                    |
| <i>H. sapiens</i>      | Senescent vs proliferating (IMR90) | -0.021                        | 0.046                | -0.274                        | 0.184                     |
| <i>H. sapiens</i>      | Senescent vs proliferating (HUVEC) | 0.014                         | 0.036                | -0.289                        | 0.020                     |

**Supplementary Table 3:** Sample size of statistical comparisons in the main figures.

| Species                    | Comparison                         | Fig. 1c/<br>Fig. 2a (All<br>introns) | Fig. 1c/ Fig.<br>2a<br>(Consistent<br>introns) | Fig. 3a | Fig. 3b | Fig. 3c | Fig. 3d<br>(Genes) |
|----------------------------|------------------------------------|--------------------------------------|------------------------------------------------|---------|---------|---------|--------------------|
| <i>C. elegans</i>          | 14 d vs 1 d                        | 576                                  | 115                                            | 2701    | 335     | 7096    | 5752               |
| <i>C. elegans</i>          | 21 d vs 1 d                        | 520                                  | 129                                            | 2451    | 335     | 7096    | 5752               |
| <i>C. elegans</i>          | 14 d ama-1<br>vs 14 d wt           | 594                                  | 176                                            | 2404    | 3702    | 5849    | 6238               |
| <i>C. elegans</i>          | 1 d ama-1 vs<br>1 d wt             | 557                                  | 99                                             | -       | 3702    | -       | 6238               |
| <i>C. elegans</i>          | 14 d wt vs 1<br>d wt               | 436                                  | 107                                            | -       | -       | -       | 6238               |
| <i>C. elegans</i>          | 14 d daf2 vs<br>14 d wt            | 518                                  | 69                                             | 2257    | 3702    | -       | 6238               |
| <i>D.<br/>melanogaster</i> | 50 d vs 30 d                       | 531                                  | 78                                             | -       | 120     | -       | -                  |
| <i>D.<br/>melanogaster</i> | 50 d RpII215<br>vs 50 d            | 1233                                 | 257                                            | 1638    | 2653    | 4952    | 2727               |
| <i>D.<br/>melanogaster</i> | 10 d RpII215<br>vs 10 d            | 1297                                 | 374                                            | -       | 2653    | 4952    | 2727               |
| <i>D.<br/>melanogaster</i> | 50 d RpII215<br>vs 10 d<br>RpII215 | 1316                                 | 299                                            | -       | 2653    | -       |                    |
| <i>D.<br/>melanogaster</i> | 50 d wt vs 10<br>d wt              | 1200                                 | 209                                            | 1676    | 2653    | 4952    |                    |
| <i>D.<br/>melanogaster</i> | 10 d dilp 2,3-<br>5 vs 10 d        | 546                                  | 77                                             | -       | 120     | -       | -                  |
| <i>D.<br/>melanogaster</i> | 50 d dilp 2,3-<br>5 vs 50 d        | 527                                  | 153                                            | -       | 120     | -       | -                  |
| <i>M. musculus</i>         | Blood (Old<br>vs. young)           | 1559                                 | 152                                            | 4546    | 393     | 41004   | 1950               |
| <i>M. musculus</i>         | DR (5 weeks)                       | 3280                                 | 625                                            | -       | -       | -       | 3441               |

| Species              | Comparison                               | Fig. 1c/<br>Fig. 2a (All<br>introns) | Fig. 1c/ Fig.<br>2a<br>(Consistent<br>introns) | Fig. 3a | Fig. 3b | Fig. 3c | Fig. 3d<br>(Genes) |
|----------------------|------------------------------------------|--------------------------------------|------------------------------------------------|---------|---------|---------|--------------------|
| <i>M. musculus</i>   | DR (16<br>weeks)                         | 3636                                 | 609                                            | -       | -       | -       | 3441               |
| <i>M. musculus</i>   | DR (26<br>weeks)                         | 3586                                 | 629                                            | -       | -       | -       | 3441               |
| <i>M. musculus</i>   | Caloric<br>restriction,<br>kidney        | 3270                                 | 148                                            | -       | 1952    | -       | 2171               |
| <i>M. musculus</i>   | 24 mo vs 3.5<br>mo                       | 4455                                 | 597                                            | 1457    | 2486    | 13297   | 5674               |
| <i>M. musculus</i>   | 26 mo IRS vs<br>26 mo                    | 5555                                 | 390                                            | 711     | 2200    | -       | -                  |
| <i>R. norvegicus</i> | 24 mo vs. 6<br>mo                        | 6384                                 | 2095                                           | 376     | -       | -       | -                  |
| <i>H. sapiens</i>    | Blood (Old<br>vs. young)                 | 6746                                 | 57                                             | 6120    | 2166    | 28683   | 4969               |
| <i>H. sapiens</i>    | Senescent vs<br>Proliferating<br>(IMR90) | 6969                                 | 2988                                           | 773     | 4932    | 1121    | 3403               |
| <i>H. sapiens</i>    | Senescent vs<br>Proliferating<br>(HUVEC) | 6497                                 | 741                                            | 8486    | 6283    | 26701   | 8620               |
